# Supplementary material for: Interfacial passivation with 4-chlorobenzene sulfonyl chloride for stable and efficient planar perovskite solar cells
Source: Royal Society of Chemistry journal article supplement (doi:10.1039/d2tc00982j), 2022-01-01
Supplement: d2tc00982j1.pdf [file d2tc00982j1.pdf]

## Interfacial passivation with 4-chlorobenzene sulfonyl chloride for stable and efficient planar perovskite solar cells

*Foo Shini<sup>1, 2, 3</sup> ‡, M. Thambidurai<sup>1, 2</sup> ‡, Herlina Arianita Dewi<sup>2</sup>, Nur Fadilah Jamaludin<sup>2</sup>, Annalisa Bruno<sup>2</sup>, Anil Kanwat<sup>2</sup>, Nripan Mathews<sup>2, 3</sup>, Cuong Dang<sup>\*1, 2</sup>, and Hung D. Nguyen<sup>\*1, 2</sup>*

1. Centre for OptoElectronics and Biophotonics (COEB), School of Electrical and Electronic Engineering, The Photonics Institute (TPI), Nanyang Technological University, 50 Nanyang Avenue, 639798, Singapore.
2. Energy Research Institute @NTU (ERI@N), Research Techno Plaza, X-Frontier Block, Level 5, 50 Nanyang Drive, 637553, Singapore.
3. School of Materials Science and Engineering, Nanyang Technological University, 50 Nanyang Avenue, 639798, Singapore.

\*Email: hcdang@ntu.edu.sg; hunghtd@ntu.edu.sg

‡ Foo Shini and M. Thambidurai contributed equally.

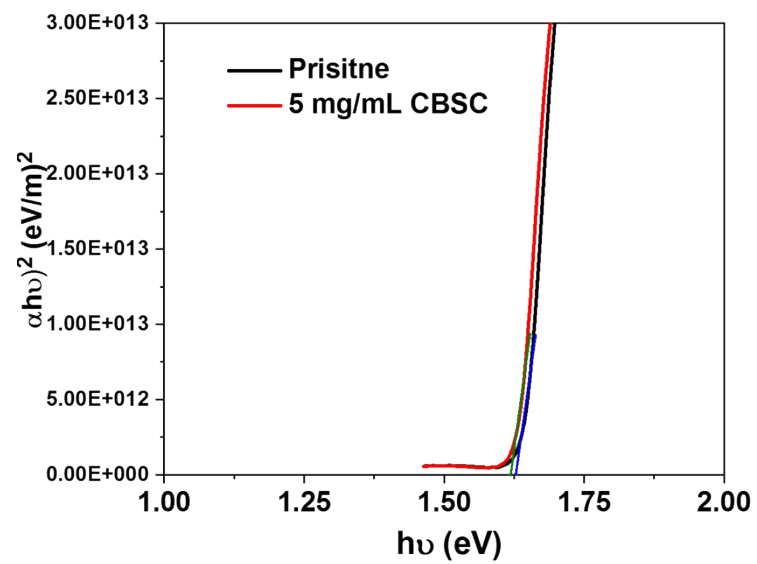

**Figure S1.** Tauc plots of the pristine and CBSC passivated perovskite films.

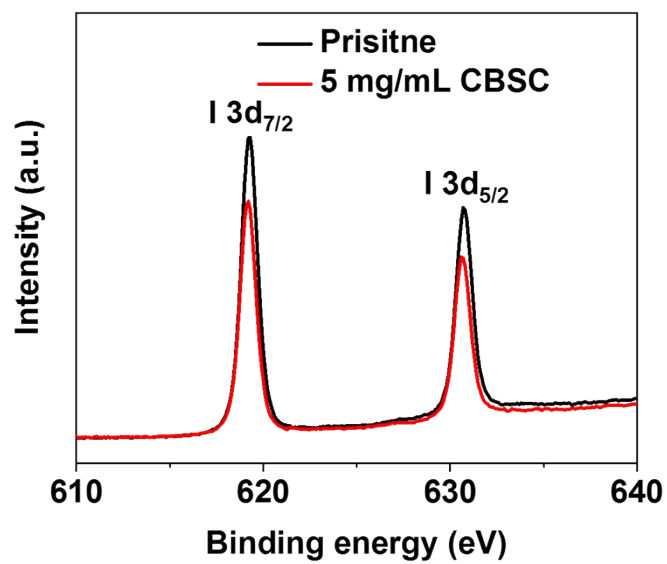

**Figure S2.** XPS spectra of the pristine and 5 mg/mL CBSC passivated films.

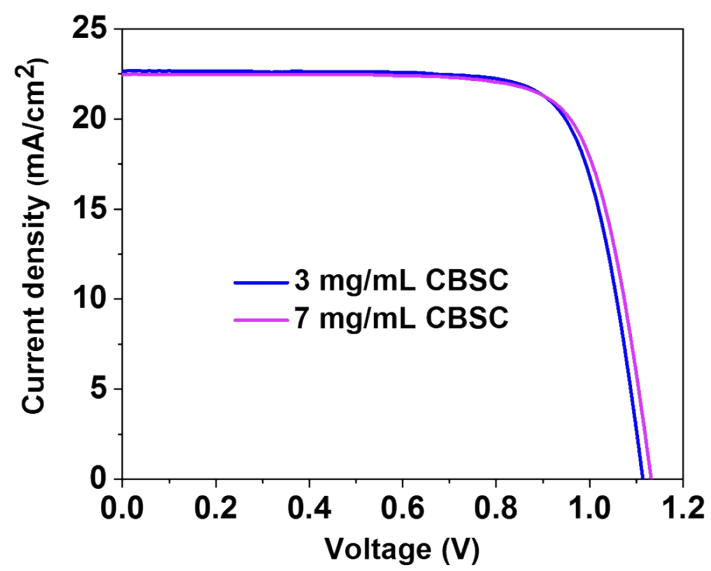

**Figure S3.** J-V curves of 3 mg/mL and 5 mg/mL CBSC passivated perovskite devices.

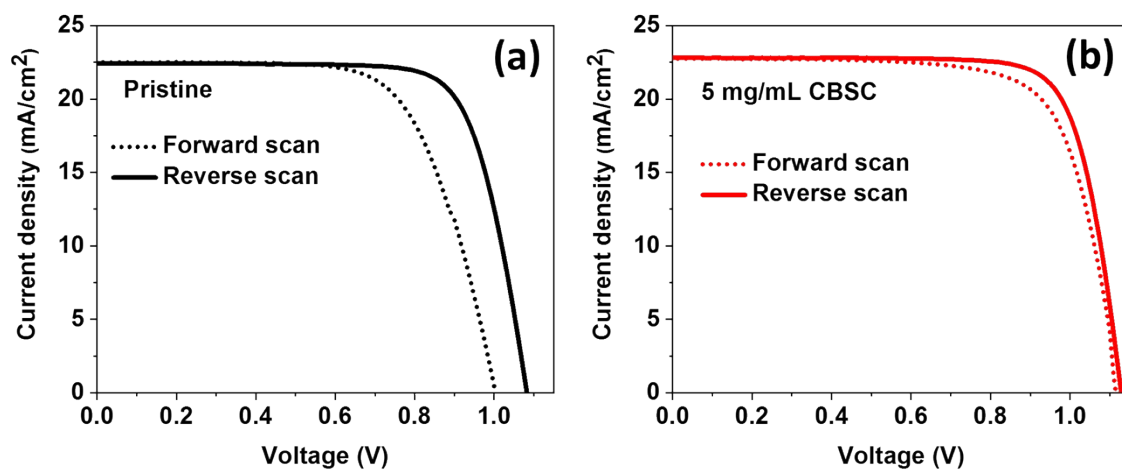

**Figure S4.** J-V curve of (a) the pristine and (b) the CBSC passivated device under reverse and forward direction.

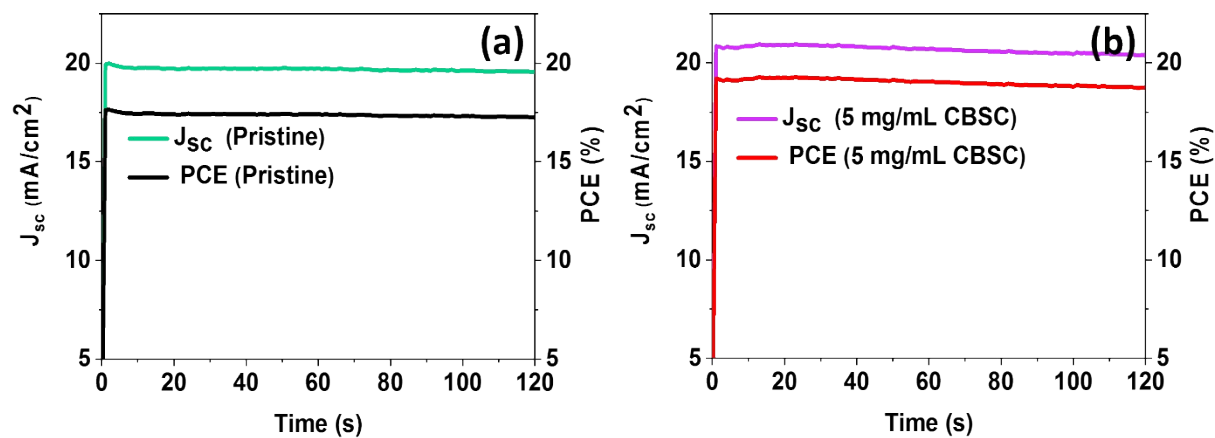

**Figure S5.** The stabilized PCE at the maximum power point (MPP) of a) the pristine device and (b) the CBSC passivated device.

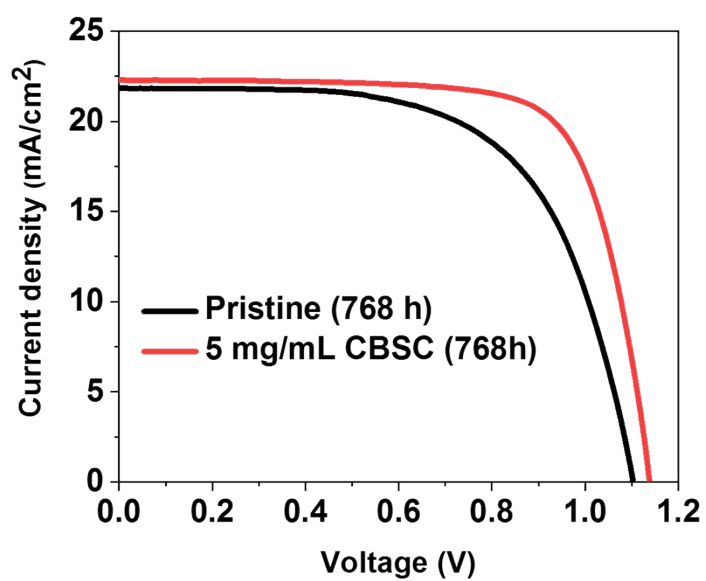

**Figure S6.** J-V curve of pristine and CBSC passivated devices after storing in a dried box (30% humidity and room temperature) for 768 hours.

Table S1: The fitting results of TRPL decay curves for 0 mg/mL (pristine), 5 mg/mL, and 7 mg/mL CBSC passivated perovskite film.

| Samples                  | $A_1$ | $\tau_1$ (ns) | $A_2$ | $\tau_2$ (ns) | $\tau_{\text{average}}$ (ns) |
|--------------------------|-------|---------------|-------|---------------|------------------------------|
| Perovskite               | 1.05  | 20.15         | 0.53  | 104.29        | 48.40                        |
| Perovskite /5 mg/mL CBSC | 0.80  | 26.81         | 0.54  | 140.02        | 72.42                        |
| Perovskite /7 mg/mL CBSC | 0.94  | 24.49         | 0.50  | 131.50        | 61.73                        |

**Table S2.** Photovoltaic parameters of champion devices with the pristine and CBSC passivated under reverse and forward scan.

| Devices      | Scan direction | Voc [V] | Jsc [mA cm <sup>-2</sup> ] | FF [%] | PCE [%] | Hysteresis index (HI) |
|--------------|----------------|---------|----------------------------|--------|---------|-----------------------|
| Pristine     | Reverse        | 1.08    | 22.43                      | 75.4   | 18.29   | 0.17                  |
|              | Forward        | 1.00    | 22.48                      | 67.34  | 15.18   |                       |
| 5 mg/mL CBSC | Reverse        | 1.13    | 22.80                      | 77.79  | 20.02   | 0.07                  |
|              | Forward        | 1.11    | 22.74                      | 72.66  | 18.47   |                       |

**Table S3.** Photovoltaic parameters of perovskite solar cells of pristine and CBSC passivated devices stored under a controlled environment (in dark, 30% RH, and room temperature).

| Devices         | Aging time | Voc<br>[V] | Jsc<br>[mA cm <sup>-2</sup> ] | FF<br>[%] | PCE<br>[%] |
|-----------------|------------|------------|-------------------------------|-----------|------------|
| Pristine        | 0 h        | 1.08       | 22.43                         | 75.4      | 18.29      |
|                 | 768 h      | 1.10       | 21.83                         | 62.87     | 15.09      |
| 5 mg/mL<br>CBSC | 0 h        | 1.13       | 22.80                         | 77.79     | 20.02      |
|                 | 768 h      | 1.13       | 22.28                         | 73.65     | 18.66      |

## Experimental Section;

**Materials:** Fluorine-doped tin oxide (FTO) substrates were purchased from Nippon sheet glass Co., Ltd. (Japan). lead (II) iodide ( $\text{PbI}_2$ , 99.99%) and Lead (II) bromide ( $\text{PbBr}_2$ , 99.99%) and were purchased from Tokyo Chemical Industry (TCI). Methylammonium bromide ( $\text{MABr}$ , > 99.5%) and Formamidinium iodide ( $\text{FAI}$ , > 99.5%) were purchased from Dyesol. Tin (II) chloride ( $\text{SnCl}_2$ , 99.99%), absolute ethanol, acetylacetone ( $\geq 99.8\%$ ), titanium (IV) butoxide (97%), 2-methoxyethanol (99.8%), 4-chlorobenzene sulfonyl chloride (97%), chlorobenzene (99.8%), acetonitrile (99.8%), 4-tert-Butylpyridine (TBP, 98%), tris(2-(1H-pyrazol-1-yl)-4-tert-butylpyridine)cobalt(III) tri[bis(trifluoromethane)sulfonimide] (FK209 Co (III) TFSI salt, 98%), spiro-OMeTAD, Bis(trifluoromethylsulfonyl)amine lithium salt (99%), dimethyl sulfoxide (DMSO, 99.99%), Cesium iodide ( $\text{CsI}$ , 99.99%) and Dimethylformamide (DMF, > 99.9%) were purchased from Sigma Aldrich company.

**Preparation of  $\text{TiO}_2$  compact layer.** A compact titanium dioxide ( $\text{c-TiO}_2$ ) layer was deposited on the surface of the cleaned FTO glass substrate using the spin coating technique of the precursor solution (0.767  $\mu\text{L}$  of titanium (IV) butoxide and 0.230  $\mu\text{L}$  of acetylacetone into 7.5 mL of 2-methoxyethanol) at 3000 rpm for 40 s and heated to 500  $^\circ\text{C}$  for an hour.

**Preparation of SnO<sub>2</sub> layer:** a thin tin-oxide (SnO<sub>2</sub>) layer was deposited by spin coating the precursor solution (22.5 mg of tin (II) chloride dissolved in 1 mL of absolute ethanol) at 5000 rpm for 20 s and annealed at 200 °C for an hour.
